# Supplementary material for: Genotype-Phenotype Correlations of Pathogenic COCH Variants in DFNA9: A HuGE Systematic Review and Audiometric Meta-Analysis
Source: MDPI journal article supplement (doi:10.3390/biom12020220), 2022-01-27
Supplement: s1 [file s1]

|                             | Risk of bias |    |    |    |    |    |    |    |
|-----------------------------|--------------|----|----|----|----|----|----|----|
|                             | D1           | D2 | D3 | D4 | D5 | D6 | D7 | D8 |
| Robertson et al. 1998       | +            | X  | X  | +  | +  | +  | +  | -  |
| Bom et al. 1999             | +            | +  | X  | -  | +  | +  | +  | +  |
| De Kok et al. 1999          | X            | X  | X  | +  | +  | +  | +  | +  |
| Fransen et al. 1999         | X            | X  | X  | +  | +  | +  | +  | -  |
| Verhagen et al. 2000        | +            | +  | +  | +  | +  | +  | X  | X  |
| Khetarpal. et al. 2000      | X            | +  | X  | -  | X  | +  | -  | -  |
| Verstreken et al. 2001      | X            | X  | +  | +  | +  | +  | X  | +  |
| Bom et al. 2001             | X            | +  | +  | -  | +  |    | -  | X  |
| Verhagen et al. 2001        | +            | +  | X  | -  | +  | +  | -  | +  |
| Kamarinos et al. 2001       | +            | X  | X  | +  | -  | -  | +  | -  |
| Bom et al. 2003             | X            | +  | -  | +  | +  |    | +  | +  |
| Lemaire et al. 2003         | +            | X  | X  | +  | +  | +  | -  | +  |
| Usami et al. 2003           | +            | +  | X  | +  | +  | +  | +  | +  |
| Bisschoff et al. 2005       | +            | +  | X  | -  | +  | +  | X  | +  |
| Kemperman et al. 2005       | +            | X  | +  | +  | +  | +  | +  | +  |
| Nagy et al. 2005            | +            | +  | X  | +  | +  | -  | +  | X  |
| Street et al. 2005          | +            | X  | +  | +  | +  | +  | +  | -  |
| Pauw et al. 2007a           | X            | +  | X  | +  | +  | +  | +  | +  |
| Pauw et al. 2007b           | +            | +  | +  | +  | +  | +  | +  | +  |
| Collin et al. 2006          | +            | X  | +  | +  | +  | +  | +  | -  |
| Yuan et al. 2008            | X            | +  | X  | +  | +  | +  | +  | X  |
| Hildebrand et al. 2009      | +            | X  | X  | -  | +  | X  | -  | +  |
| McComiskey et al. 2010      | +            | +  | +  | +  | +  | X  | -  | +  |
| Baek et al. 2010            | +            | +  | +  | +  | +  | +  | +  | X  |
| Hildebrand et al. 2010      | +            | X  | X  | +  | +  | +  | +  | -  |
| Pauw et al. 2011            | +            | +  | +  | +  | +  | X  | +  | -  |
| Fal.etra et al. 2011        | +            | +  | +  | +  | +  | +  | +  | X  |
| Cho et al. 2012             | +            | +  | +  | +  | +  | +  | +  | X  |
| Choi et al. 2013            | +            | +  | X  | +  | +  |    | +  | +  |
| Chen et al. 2013            | +            | +  | +  | +  | +  | +  | +  | +  |
| Gao et al. 2013             | +            | +  | X  | +  | +  |    | +  | -  |
| Galant et al. 2013          | +            | +  | X  | +  | -  |    | +  | -  |
| Wei et al. 2014             | +            | +  | +  | +  | +  | X  | +  | -  |
| Chang et al. 2014           | +            | +  | X  | +  | +  | +  | +  | X  |
| de Varebeke et al. 2014     | X            | +  | +  | -  | +  | +  | -  | +  |
| Tsukada et al. 2015         | +            | X  | +  | +  | +  | +  | +  | X  |
| Jung et al. 2015            | +            | X  | X  | +  | +  | +  | +  | -  |
| Kim et al. 2015             | X            | +  | -  | +  | +  |    | +  | +  |
| Kim et al. 2016             | +            | +  | +  | +  | +  | +  | +  | -  |
| Gu et al. 2016              | +            | X  | X  | +  | +  | +  | +  | X  |
| Burgess et al. 2016         | +            | +  | +  | +  | +  |    | -  | +  |
| SloanHighHeggen et al. 2016 | +            | +  | +  | +  | +  | X  | +  | +  |
| Wang et al. 2017            | X            | +  | +  | +  | +  | +  | +  | -  |
| Parzefal et al. 2018        | +            | +  | +  | +  | +  |    | +  | -  |
| Alberts et al. 2018         | +            | +  | +  | +  |    | +  | +  | -  |
| Oziebło et al. 2018         | X            | +  | +  | +  | +  | +  | +  | +  |
| Basu et al. 2019            | X            | +  | X  | +  |    |    | +  | +  |
| Smits et al. 2020           | +            | +  | +  | +  | +  | +  | +  | -  |

D1: Selective inclusion  
 D2: Selective loss to follow-up  
 D3: Selective reporting  
 D4: Genotype assessment  
 D5: Audiologic phenotype assessment  
 D6: Vestibular phenotype assessment  
 D7: Population stratification  
 D8: Other confounders

Judgement  
 X High  
 - Unclear  
 + Low  
 Not applicable
