# Supplementary material for: Genotype-Phenotype Correlations of Pathogenic COCH Variants in DFNA9: A HuGE Systematic Review and Audiometric Meta-Analysis
Source: MDPI journal article supplement (doi:10.3390/biom12020220), 2022-01-27
Supplement: s1 [file s1]

**Genotype-phenotype correlations of pathogenic *COCH* variants in DFNA9: a  
HuGE systematic review and audiometric meta-analysis**

## **Supplementary Information**

**Supplementary Table S1:** Search strategy

|                             |                                                                                                                                                                                                                                                                                |
|-----------------------------|--------------------------------------------------------------------------------------------------------------------------------------------------------------------------------------------------------------------------------------------------------------------------------|
| <b>PubMed/Gene database</b> | "COCH protein, human" [Supplementary Concept] OR "Deafness, Autosomal Dominant 9" [Supplementary Concept]<br>OR<br>COCH [text word (tw)] OR cochlin [tw] OR coagulation factor C homolog [tw]<br>OR Coch5B2 [tw] OR COCH-5B2 [tw] OR DFNA9 [tw]<br>OR<br>PubMed Links for Gene |
| <b>EMBASE</b>               | Cochlin/<br>OR<br>(COCH OR cochlin OR coagulation factor C homolog OR Coch5B2 OR COCH-5B2 OR DFNA9).mp                                                                                                                                                                         |
| <b>The Cochrane Library</b> | (Search "All text") COCH OR Cochlin OR "coagulation factor C homolog" OR Coch5B2 OR COCH-5B2 OR DFNA9                                                                                                                                                                          |
| <b>Web of Science</b>       | (Search on "Topic") COCH OR cochlin OR "Coagulation factor C homolog" OR Coch5B2 OR COCH-5B2 OR DFNA9                                                                                                                                                                          |

Legend: PubMed, NCBI's Gene database, EMBASE, the Cochrane Library and Web of Science were searched for relevant studies. All available MeSH terms were combined with free text words of all known synonyms of COCH and DFNA9.

Supplementary Table S2. Study characteristics and overview of the audiovestibular phenotype

| Variant in COCH Protein domain | Author year         | Population /ethnicity | Sample size                                 |                      | Clinical evaluation         |                                       |                                |                         |                               | Self-reported age of onset and complaints |                    |    |    |
|--------------------------------|---------------------|-----------------------|---------------------------------------------|----------------------|-----------------------------|---------------------------------------|--------------------------------|-------------------------|-------------------------------|-------------------------------------------|--------------------|----|----|
|                                |                     |                       | Genetically confirmed (inheritance pattern) | Clinically suspected | Audiologic                  | Vestibular                            | Additional                     | Onset of hearing loss   | Onset of vestibular complaint | Vestibular complaints                     | Vestibular results |    |    |
|                                |                     |                       |                                             |                      |                             |                                       |                                |                         |                               |                                           | Va                 | Vh | Vn |
| c.113G>A (p.Gly38Asp) LCCL     | Wei et al, 2014     | Chinese               | 13 (AD)                                     | NA                   | History, PE, PTA            | History, PE                           | NA                             | Late-onset              | NA                            | No symptoms                               |                    |    |    |
|                                | Chang et al, 2014   | Korean                | 1 (AD)                                      | NA                   | History, PTA                | History, VNG, caloric, rotatory       | NA                             | 41                      | NA                            | No symptoms                               |                    |    |    |
|                                | Choi et al, 2013    | Korean                | 1 (AD)                                      | NA                   | History, PTA                | History, VNG, caloric, rotatory       | NA                             | 41                      | NA                            | No symptoms                               | NA                 | 2  | 1  |
|                                | Kim et al, 2016     | Korean                | 6 (AD)                                      | 12                   | History, PTA                | PE, caloric, rotatory, ECOG           | NA                             | 30-40                   | NA                            | No symptoms                               |                    |    |    |
| c. 151C>T (p.Pro51Ser) LCCL    | Bom et al, 1999     | Dutch                 | 16 (AD)                                     | 6                    | History, PE, PTA            | History, ENG, caloric, rotatory       | History (CVD), PE (neurologic) | 36–63 Calculated: 34–51 | NA                            | NA                                        |                    |    |    |
|                                | de Kok et al, 1999  | Dutch                 | 23 (AD)                                     | 24                   | History, PE (otologic), PTA | History, EOG, rotatory                | PE (neurologic)                | 30–62                   | 30–62                         | Instability in the dark, oscillopsia      | 62                 | 23 | 17 |
|                                | Bom et al, 2003     | Dutch                 | 34 (AD)                                     | NA                   | History, PTA                | NA                                    | NA                             | Calculated: 32,1–40,7   | NA                            | NA                                        |                    |    |    |
|                                | Fransen et al, 1999 | Belgian               | 34 (AD)                                     | 13                   | History, PE, PTA            | History, PE, vestibular testing (N/S) | NA                             | 42 (35–56)              | 42 (35–56)                    | Vertigo/no symptoms                       |                    |    |    |

|                                  |               |         |    |                                            |                                 |                                                     |                                         |                                         |                                                                                     |
|----------------------------------|---------------|---------|----|--------------------------------------------|---------------------------------|-----------------------------------------------------|-----------------------------------------|-----------------------------------------|-------------------------------------------------------------------------------------|
| Verstreken et al, 2001           | Belgian       | 60 (AD) | 13 | History, PE, PTA, supraliminary tests*     | History, ENG, caloric, rotatory | CT, MR, PE (neurologic, ophthalmic), urine sediment | 39 ± 10 (20–56)                         | 38 ± 11 (5–57)                          | Instability in the dark, vertigo, tendency to fall, drunken feeling, aural fullness |
| Janssens de Varebeke et al, 2014 | Caucasian     | 9 (NA)  | NA | History, PTA                               | History, ENG, caloric, rotatory | CT, MR, CBCT                                        | 46 <sup>a</sup>                         | 35–50                                   | Instability in the dark, vertigo, oscillopsia, aural fullness, dizziness            |
| Bom et al, 2001                  | Dutch Flemish | 42 (AD) | NA | PTA, SA                                    | NA                              | NA                                                  | 42                                      | NA                                      | NA                                                                                  |
| Verhagen et al, 2000             | NA            | 4 (AD)  | NA | History, PTA                               | ENG, caloric rotatory           | NA                                                  | Calculated: 28                          | 40                                      | Instability in the dark, vertigo, nausea, oscillopsia                               |
| Bischoff et al, 2005             | Dutch         | 30 (AD) | 14 | History, PE, PTA, SA, BAEP                 | History, ENG, rotatory          | CT, MR, PE (neurologic)                             | 39 (18–51)<br>Calculated: 43 (38–49)    | 34 (29–39)                              | Vertigo/no symptoms                                                                 |
| Lemaire et al, 2003              | Belgian       | 16 (AD) | NA | History, PE, PTA, SA                       | History, ENG, caloric rotatory  | NA                                                  | 30–45                                   | 30–45                                   | Instability in the dark, vertigo, oscillopsia, aural fullness/no symptoms           |
| Verhagen et al, 2001             | Dutch         | 8 (AD)  | 8  | History, PTA                               | History, ENG, caloric, rotatory | History (CVD)                                       | 35–45                                   | 4 <sup>th</sup> –5 <sup>th</sup> decade | Instability in the dark, vertigo, nausea, oscillopsia, motion sickness/no symptoms  |
| Parzefall et al, 2018            | Austrian      | 5 (AD)  | 2  | History, PE (otologic), PTA, Freiburger-SA | NA                              | CT, MR                                              | 4 <sup>th</sup> –5 <sup>th</sup> decade | NA                                      | NA                                                                                  |
| Hildebrand et al, 2009           | American      | 6 (AD)  | 10 | History, PTA                               | History                         | CT                                                  | 4 <sup>th</sup> –7 <sup>th</sup> decade | NA                                      | Instability in the dark, dizziness, no symptoms                                     |
| McComiskey et al, 2010           | Canadian      | 7 (AD)  | 5  | History, PTA                               | History                         | History (ophthalmic), CT                            | 35–49                                   | 32–50                                   | Instability, vertigo, dizziness/no symptoms                                         |

|                                  |                          |           |         |    |                                     |                                                    |                       |                                               |                                  |                                                                |        |        |        |        |
|----------------------------------|--------------------------|-----------|---------|----|-------------------------------------|----------------------------------------------------|-----------------------|-----------------------------------------------|----------------------------------|----------------------------------------------------------------|--------|--------|--------|--------|
|                                  | Alberts et al, 2018      | Dutch     | 16 (AD) | NA | NA                                  | Rotatory, VEMP, vHIT, velocity step tests, caloric | NA                    | NA                                            | < 49 <sup>a</sup>                | NA                                                             |        |        |        |        |
| c.197T>G<br>(p.Val66Gly)<br>LCCL | Robertson et al, 1998    | American  | 16 (NA) | 5  | History, PE (ORL, genetic), PTA, SA | Vestibular tests(N/S)                              | PE (neurologic), MR   | 20.8                                          | NA                               | No symptoms                                                    |        | 3      | N<br>A | N<br>A |
|                                  | Khetarpal et al, 2000    | American  | 3 (AD)  | NA | History, PE (ORL)                   | History, ENG, SVAR, S/D posturography              | PE (neurologic)       | 16–26                                         | 21–28                            | NA                                                             |        |        |        |        |
| c.226G>A<br>(p.Ala76Thr)<br>LCCL | Sloan-Heggen et al, 2016 | Caucasian | 3 (AD)  | NA | History, PE, PTA                    | History                                            | NA                    | Teens - 40                                    | 40                               | Vertigo, dizziness, balance problems/no symptoms               | N<br>A | N<br>A | N<br>A |        |
| c.259G>T<br>(p.Gly87Trp)<br>LCCL | Collin et al, 2006       | Dutch     | 1 (AD)  | 24 | History, PTA                        | History, ENG                                       | NA<br>PE (ophthalmic) | 43 (10–66)                                    |                                  | Instability in the dark, vertigo, tendency to fall/no symptoms | 2      | 8      | N<br>A |        |
|                                  | Pauw et al, 2007a        | Dutch     | 17 (AD) | 8  | History, PE, PTA, SA                | History, ENG, caloric, rotatory                    |                       | 51 (30–65)                                    |                                  |                                                                |        |        |        |        |
| c.260G>T<br>(p.Gly87Val)<br>LCCL | Chen et al, 2013         | Chinese   | 5 (AD)  | 3  | History, PE, PTA, OAE               | History, PE, ENG                                   | NA                    | Mid–40s                                       | NA                               | Vestibular symptoms                                            | N<br>A | 1      | N<br>A |        |
| c.263G>A<br>(p.Gly88Glu)<br>LCCL | Kemperman et al, 2005    | Dutch     | 16 (AD) | 13 | History, PE (otologic) PTA, SA      | History, ENG, caloric, rotatory                    | History (CVD), CT, MR | 46 (40–68)                                    | Approximately the same age as HI | Instability in the dark, vertigo, tendency to fall/no symptoms |        |        |        |        |
|                                  | Robertson et al, 1998    | American  | 6 (AD)  | 6  | History, PE (ORL, genetic), PTA, SA | Vestibular tests(N/S)                              | PE (neurologic), MR   | 4 <sup>th</sup> decade–5 <sup>th</sup> decade | 48–67                            | Vertigo, oscillopsia, balance problems, dizziness/no symptoms  | 5      | 2      | 6      |        |
|                                  | Tsukada et al, 2015      | Japanese  | 4 (AD)  | 1  | History, PTA, SA                    | History, caloric, VEMP, CDP                        | NA                    | Early 50s                                     | 64                               | Vestibular symptoms, dizziness/no symptoms                     |        |        |        |        |

|                                          |                           |                |                         |    |                                          |                                          |                        |                                            |                               |                                                                                      |        |        |        |
|------------------------------------------|---------------------------|----------------|-------------------------|----|------------------------------------------|------------------------------------------|------------------------|--------------------------------------------|-------------------------------|--------------------------------------------------------------------------------------|--------|--------|--------|
| c.275T>A<br>(p.Val92Asp)<br>LCCL         | Gu et al,<br>2016         | Chinese        | 7 (AD)                  | 4  | History,<br>PE, PTA                      | History,<br>ENG,<br>caloric              | NA                     | 2 <sup>nd</sup> –3 <sup>rd</sup><br>decade | NA                            | Vertigo, dizziness/no<br>symptoms                                                    | N<br>A | 5      | N<br>A |
| c.311_313delTAG<br>(p.Val104del)<br>LCCL | Nagy et al,<br>2005       | Hungaria<br>n  | 1<br>(de novo or<br>AD) | NA | History,<br>PTA                          | NA                                       | NA                     | 32                                         | 32                            | Vertigo, nausea, vomiting                                                            | 1      | N<br>A | N<br>A |
| c.326T>A<br>(p.Ile109Asn)<br>LCCL        | Pauw et al,<br>2011       | Australia<br>n | 8 (AD)                  | 6  | History,<br>PTA, SA                      | History                                  | NA                     | 30–43                                      | After symptoms<br>of HL       | Instability in the dark,<br>vertigo, oscillopsia,<br>tendency to fall/no<br>symptoms | N<br>A | N<br>A | N<br>A |
|                                          | Kamarinos<br>et al, 2001  | Australia<br>n | 13 (AD)                 | NA | NA                                       | NA                                       | NA                     | 2 <sup>nd</sup> –3 <sup>rd</sup><br>decade | By the time of<br>profound HL | Instability in the dark,<br>vertigo, oscillopsia, balance<br>problems                |        |        |        |
| c.326T>C<br>(p.Ile109Thr)<br>LCCL        | Pauw et al,<br>2007b      | Dutch          | 11 (AD)                 | 2  | History,<br>PE, PTA,<br>SA               | History,<br>ENG,<br>caloric,<br>rotatory | PE<br>(ophthalm<br>ic) | 43 (35–52)                                 | 65 (58–73)                    | Instability in the dark,<br>vertigo, oscillopsia,<br>tendency to fall/no<br>symptoms | N<br>A | N<br>A | 6      |
| c.341T>C<br>(p.Leu114Pro)<br>LCCL        | Burgess et<br>al, 2016    | American       | 1 (AD)                  | 4  | History,<br>PTA                          | History                                  | CT                     | 30                                         | NA                            | No symptoms                                                                          |        |        |        |
|                                          | Chang et<br>al, 2014      | Korean         | 1 (AD)                  | NA | History,<br>PTA                          | History                                  | NA                     | 28                                         | NA                            | No symptoms                                                                          | N<br>A | N<br>A | N<br>A |
|                                          | Choi et al,<br>2013       | Korean         | 1 (AD)                  | NA | History,<br>PTA                          | History                                  | NA                     | 28                                         | NA                            | No symptoms                                                                          |        |        |        |
| c.349T>C<br>(p.Trp117Arg)<br>LCCL        | Baek et al,<br>2010***    | Korean         | 10 (AD)                 | 2  | History,<br>PE, PTA,<br>SA               | History,<br>PE, caloric                  | NA                     | Early 30s                                  | NA                            | Dizziness/no symptoms                                                                | 1      | N<br>A | N<br>A |
| c.355G>A<br>(p.Ala119Thr)<br>LCCL        | Usami et<br>al, 2003      | Japanese       | 1 (AD)                  | 1  | History,<br>PTA                          | History,<br>caloric                      | CT                     | 4 <sup>th</sup> decade                     | 4 <sup>th</sup> decade        | Vertigo, dizziness                                                                   | N<br>A | 1      | N<br>A |
| c.362T>C<br>(p.Phe121Ser)<br>LCCL        | Hildebrand<br>et al, 2010 | American       | 7 (AD)                  | 3  | PE<br>(otologic<br>&<br>genetic),<br>PTA | ENG,<br>caloric                          | NA                     | 2 <sup>nd</sup> –3 <sup>rd</sup><br>decade | NA                            | Vertigo, positional<br>nystagmus, balance<br>problems, dizziness                     | N<br>A | N<br>A | N<br>A |
| c.368T>A<br>(p.Val123Glu)<br>Ivd1        | Jung et al,<br>2015       | Korean         | 3 (AD)                  | 3  | History,<br>PTA, ABR                     | History,<br>caloric                      | CT, MR                 | 44.4 ± 6.3<br>(37–52)                      | NA                            | No symptoms                                                                          | N<br>A | N<br>A | 1      |
| c.485G>A<br>(p.Cys162Tyr)<br>Ivd1        | Kim et al,<br>2015        | Korean         | 1 (AD)                  | 5  | History,<br>PE<br>(otologic              | NA                                       | NA                     | 30 <sup>a</sup>                            | NA                            | NA                                                                                   | N<br>A | N<br>A | N<br>A |

| Mutation                                          | Ref.                 | Ethnicity | Age     | Sex | Hearing test                                                               |                                                                | Imaging | Age of onset                               | Onset age              | Symptoms                                     | Outcome |        |        |        |
|---------------------------------------------------|----------------------|-----------|---------|-----|----------------------------------------------------------------------------|----------------------------------------------------------------|---------|--------------------------------------------|------------------------|----------------------------------------------|---------|--------|--------|--------|
|                                                   |                      |           |         |     | PTA                                                                        | History                                                        |         |                                            |                        |                                              | N       | A      | N      |        |
| c.1115T>C<br>(p.Ile372Thr)<br>vWFA2               | Wang et al, 2017     | Chinese   | 2 (AD)  | 28  | & genetic),<br>PTA<br>History,<br>PTA,<br>tympanometry,<br>TEOAE,<br>DPOAE | History,<br>VNG,<br>ECOG,<br>caloric,<br>VEMP,<br>vHIT         | NA      | 2 <sup>nd</sup> –4 <sup>th</sup><br>decade | 4 <sup>th</sup> decade | Vertigo, aural fullness/no symptoms          |         |        |        |        |
|                                                   | Gao et al, 2013      | Chinese   | 9 (AD)  | 16  | History,<br>PTA                                                            | History                                                        | NA      | 17                                         | NA                     | No symptoms                                  |         |        |        |        |
|                                                   | Kim et al, 2016      | Korean    | 5 (AD)  | 1   | PTA                                                                        | History,<br>PE, caloric,<br>rotatory                           | NA      | NA                                         | NA                     | Vertigo, vomiting, aural fullness, dizziness |         |        |        |        |
| c.1115T>C<br>(p.Ile372Thr)<br>vWFA2               | Oziębło et al, 2018  | Polish    | 5 (AD)  | 2   | History,<br>PTA                                                            | History,<br>VEMP<br>(cervical and ocular)                      | NA      | 28.25 years<br>(15–47 years)               | NA                     | No symptoms                                  |         | 2      | 1      | 1      |
|                                                   | Tsukada et al, 2015  | Japanese  | 3 (AD)  | 6   | History,<br>PTA, SA                                                        | History                                                        | NA      | 33–42                                      | NA                     | No symptoms                                  |         |        |        |        |
| c.1312C>T<br>(p.Arg438Cys)<br>vWFA2               | Smits et al, 2021    | Dutch     | 14 (AD) | 1   | PTA, SA,<br>History,<br>otoscopy                                           | History                                                        | MRI     | 33 (18–49)                                 | NA                     | Balance problems                             |         | 4      | N<br>A | 10     |
| c.1196_1213del18<br>(p.Ile399_Ala404del)<br>vWFA2 | Gallant et al, 2013  | American  | 3 (AD)  | 5   | History,<br>PE                                                             | NA                                                             | MR      | Mid to late 20s                            | NA                     | No symptoms                                  |         | N<br>A | N<br>A | N<br>A |
| c.1459C>G<br>(p.Ala487Pro)<br>vWFA2               | Falettra et al, 2011 | Italian   | 9 (AD)  | 1   | History,<br>PE (ORL),<br>PTA                                               | History,<br>caloric                                            | NA      | 2 <sup>nd</sup> –3 <sup>rd</sup><br>decade | NA                     | Vertigo, dizziness                           |         | N<br>A | 1      | N<br>A |
| c.1535T>C<br>(p.Met512Thr)<br>vWFA2               | Yuan et al, 2008     | Chinese   | 2 (AD)  | NA  | History,<br>audiometric testing<br>(N/S)                                   | Oculomotor test, CDP,<br>rotatory,<br>SOT,<br>VEMP             | NA      | 43                                         | NA                     | No symptoms                                  |         | N<br>A | N<br>A | 2      |
| c.1580T>G<br>(p.Phe527Cys)<br>vWFA2               | Cho et al, 2012      | Korean    | 2 (AD)  | 4   | History,<br>PE, PTA                                                        | History,<br>**PE<br>(vestibular)<br>posturography,<br>rotatory | NA      | 26 <sup>a</sup>                            | NA                     | No symptoms                                  |         | N<br>A | N<br>A | 1      |

|                                      |                             |           |         |    |                                             |                                                                                                |                             |                                            |              |             |    |    |    |    |
|--------------------------------------|-----------------------------|-----------|---------|----|---------------------------------------------|------------------------------------------------------------------------------------------------|-----------------------------|--------------------------------------------|--------------|-------------|----|----|----|----|
| c.1621A>T,<br>(p.Ile541Phe)<br>vWFA2 | Basu et al,<br>2019         | Caucasian | 1 (AD)  | 3  | History,<br>otoscopy,<br>PTA                | NA                                                                                             | CT,<br>autoimmune<br>workup | Childhood                                  | NA           | NA          | NA | NA | NA | NA |
| c.1624T>C<br>(p.Cys542Arg)<br>vWFA2  | Tsukada et al,<br>2015      | Japanese  | 1 (AD)  | 3  | History,<br>PTA, SA                         | History                                                                                        | NA                          | Grade<br>school                            | Grade school | Vertigo     | NA | NA | NA | NA |
| c.1625G>A<br>(p.Cys542Tyr)<br>vWFA2  | Yuan et al,<br>2008         | Chinese   | 6 (AD)  | NA | History,<br>audiometric<br>testing<br>(N/S) | Oculomotor<br>test, CDP,<br>rotatory,<br>SOT,<br>VEMP                                          | NA                          | 2 <sup>nd</sup> –5 <sup>th</sup><br>decade | NA           | No symptoms | NA | 6  | NA | NA |
| c.1625G>T<br>(p.Cys542Phe)<br>vWFA2  | Street et al,<br>2005       | American  | 16 (AD) | 4  | History,<br>PTA,<br>tympanometry            | History,<br>oculomotor<br>test<br>(VNG),<br>CDP, EOG,<br>ENG,<br>caloric,<br>rotatory,<br>VEMP | NA                          | 16–25                                      | NA           | No symptoms | NA | 3  | NA | NA |
|                                      | Sloan-Heggen et al,<br>2016 | Caucasian | 3 (AD)  | NA | History,<br>PE, PTA                         | History                                                                                        | NA                          | NA                                         | NA           | NA          | NA |    |    |    |

Legend: COCH transcript NM\_004086.2 was used as reference sequence. Vestibular function assessment (both examination and reports of subjects) varied between and within subjects. Therefore, all findings in a study are reported. NA: not available, AD: autosomal dominant <sup>a</sup>: derived from the audiogram, pure tone average or vestibular test(s), Vb: bilateral vestibular dysfunction, Vu: unilateral vestibular dysfunction, Vn: no vestibular dysfunction, PTA: pure tone audiometry, PE: physical examination, OAE: otoacoustic emission, SA: speech audiometry, BAEP: brainstem auditory evoked potential, supraliminary tests\*: speech audiometry, tone-decay test, short increment sensitivity index test, impedance audiometry, transient evoked otoacoustic emissions & brainstem auditory responses, TEOAE: transient evoked product otoacoustic emission, DPOAE: distortion product otoacoustic emission, ABR: auditory brainstem response, ECOG: electrocochleography, ENG: electronystagmography, SVAR: sinusoidal vertical axis rotation, S/D posturography: static & dynamic posturography, CDP: computerized dynamic posturography, SOT: sinusoidal oscillation test, VEMP: vestibular evoked myogenic potential, EOG: electrooculography, VNG: videonystagmography, vHIT: video head impulse test, \*\* PE (vestibular: spontaneous nystagmus, head shaking test, Dix-Hallpike test, positional test), CT: computed tomography, MR: magnetic resonance, CBCT: cone beam computed tomography. \*\*\*One family (1St) described by Robertson et al. (1998), with the p.Trp117Arg variant, was excluded because of a lack of phenotypic data [9].



Supplementary Table S3: Risk of bias summary.

| Study                     | Risk of bias |    |    |    |    |    |    |    |
|---------------------------|--------------|----|----|----|----|----|----|----|
|                           | D1           | D2 | D3 | D4 | D5 | D6 | D7 | D8 |
| Robertson et al. 1988     | +            | +  | +  | +  | +  | +  | +  | +  |
| Bore et al. 1988          | +            | +  | +  | +  | +  | +  | +  | +  |
| De Riva et al. 1989       | +            | +  | +  | +  | +  | +  | +  | +  |
| Forrest et al. 1989       | +            | +  | +  | +  | +  | +  | +  | +  |
| Verhagen et al. 2000      | +            | +  | +  | +  | +  | +  | +  | +  |
| Khalafallah et al. 2000   | +            | +  | +  | +  | +  | +  | +  | +  |
| Verheulen et al. 2001     | +            | +  | +  | +  | +  | +  | +  | +  |
| Bore et al. 2001          | +            | +  | +  | +  | +  | +  | +  | +  |
| Verhagen et al. 2001      | +            | +  | +  | +  | +  | +  | +  | +  |
| Karimov et al. 2001       | +            | +  | +  | +  | +  | +  | +  | +  |
| Bore et al. 2003          | +            | +  | +  | +  | +  | +  | +  | +  |
| Leong et al. 2003         | +            | +  | +  | +  | +  | +  | +  | +  |
| Ustun et al. 2003         | +            | +  | +  | +  | +  | +  | +  | +  |
| Beauchamp et al. 2003     | +            | +  | +  | +  | +  | +  | +  | +  |
| Kirgisenov et al. 2005    | +            | +  | +  | +  | +  | +  | +  | +  |
| Nagy et al. 2005          | +            | +  | +  | +  | +  | +  | +  | +  |
| Green et al. 2005         | +            | +  | +  | +  | +  | +  | +  | +  |
| Pauw et al. 2007a         | +            | +  | +  | +  | +  | +  | +  | +  |
| Pauw et al. 2007b         | +            | +  | +  | +  | +  | +  | +  | +  |
| Collo et al. 2008         | +            | +  | +  | +  | +  | +  | +  | +  |
| Vujan et al. 2009         | +            | +  | +  | +  | +  | +  | +  | +  |
| Hildebrand et al. 2009    | +            | +  | +  | +  | +  | +  | +  | +  |
| McCurley et al. 2010      | +            | +  | +  | +  | +  | +  | +  | +  |
| Bore et al. 2010          | +            | +  | +  | +  | +  | +  | +  | +  |
| Hildebrand et al. 2010    | +            | +  | +  | +  | +  | +  | +  | +  |
| Pauw et al. 2011          | +            | +  | +  | +  | +  | +  | +  | +  |
| Fujita et al. 2011        | +            | +  | +  | +  | +  | +  | +  | +  |
| Chen et al. 2012          | +            | +  | +  | +  | +  | +  | +  | +  |
| Chen et al. 2013          | +            | +  | +  | +  | +  | +  | +  | +  |
| Chen et al. 2013          | +            | +  | +  | +  | +  | +  | +  | +  |
| Qian et al. 2013          | +            | +  | +  | +  | +  | +  | +  | +  |
| Qian et al. 2013          | +            | +  | +  | +  | +  | +  | +  | +  |
| Wu et al. 2014            | +            | +  | +  | +  | +  | +  | +  | +  |
| Chang et al. 2014         | +            | +  | +  | +  | +  | +  | +  | +  |
| de Verdoux et al. 2014    | +            | +  | +  | +  | +  | +  | +  | +  |
| Teyssie et al. 2015       | +            | +  | +  | +  | +  | +  | +  | +  |
| Jung et al. 2015          | +            | +  | +  | +  | +  | +  | +  | +  |
| Kim et al. 2015           | +            | +  | +  | +  | +  | +  | +  | +  |
| Kim et al. 2015           | +            | +  | +  | +  | +  | +  | +  | +  |
| Gu et al. 2015            | +            | +  | +  | +  | +  | +  | +  | +  |
| Seung et al. 2016         | +            | +  | +  | +  | +  | +  | +  | +  |
| Scoringmiller et al. 2016 | +            | +  | +  | +  | +  | +  | +  | +  |
| Wang et al. 2017          | +            | +  | +  | +  | +  | +  | +  | +  |
| Poppe et al. 2018         | +            | +  | +  | +  | +  | +  | +  | +  |
| Albert et al. 2018        | +            | +  | +  | +  | +  | +  | +  | +  |
| Giusti et al. 2018        | +            | +  | +  | +  | +  | +  | +  | +  |
| Bore et al. 2019          | +            | +  | +  | +  | +  | +  | +  | +  |
| Smith et al. 2020         | +            | +  | +  | +  | +  | +  | +  | +  |

D1: Selective inclusion  
D2: Selective loss to follow-up  
D3: Selective reporting  
D4: Genotype assessment  
D5: Auditory phenotype assessment  
D6: Vestibular phenotype assessment  
D7: Population stratification  
D8: Other confounders

judgment

High

Unclear

Low

Not applicable

Legend: Judgements of two reviewers about each risk of bias items for all included studies according to the PRISMA guidelines

**Supplementary Table S4:** Variants in COCH that are not associated with DFNA9.

| Variant (zygosity)                                                              | References                         | Sample size |            | Age of onset (in years) |              | Progression of hearing loss | Vestibular dysfunction |                                 | Remarks                                                                          |
|---------------------------------------------------------------------------------|------------------------------------|-------------|------------|-------------------------|--------------|-----------------------------|------------------------|---------------------------------|----------------------------------------------------------------------------------|
|                                                                                 |                                    | Genetically | Clinically | HL                      | V            |                             | Examination            | Reported by subjects            |                                                                                  |
| c.266C>A (p.Pro89His) (heterozygous)                                            | Dodson et al. (2012)               | 1           | NA         | Birth                   | NA           | NA                          | NA                     | NA                              | Enlarged vestibular Aqueduct; identified in two in-house normal hearing subjects |
| c.292C>T (p.Arg98X) (homozygous)                                                | Janssens de Varebeke et al. (2018) | 2           | NA         | Birth                   | First decade | 1.8–2.0 dB/year             | Vb / Vn                | Vestibular symptoms/no symptoms | DFNB110 phenotype                                                                |
| c.116T>A (p.Leu39X) (homozygous)                                                | Mehregan et al. (2019)             | 3           | 3          | School age              | NA           | NA                          | NA                     | No symptoms                     | DFNB110 phenotype                                                                |
| c.984_985dup (p.Phe329Leufs*16) (homozygous)                                    | Danial-Farran et al. (2020)        | 3           | NA         | Pre-lingual             | NA           | Yes                         | NA                     | NA                              | DFNB110 phenotype                                                                |
| c.631G>T (p.Glu211Ter) (homozygous)                                             | Booth et al, (2020)                | 1           | NA         | Birth                   | NA           | NA                          | NA                     | NA                              | DFNB110 phenotype                                                                |
| c.439A>T (p.Lys147Ter)* c.571_572delinsAG (p.Val191Arg) (compound heterozygous) | Booth et al, (2020)                | 1           | NA         | Birth                   | NA           | NA                          | NA                     | NA                              | DFNB110 phenotype                                                                |
| c.271C>G (p.Arg91Gly) (homozygous)                                              | Booth et al, (2020)                | 1           | NA         | Birth                   | NA           | NA                          | NA                     | NA                              | DFNB110 phenotype                                                                |
| c.1093_1101del (p.Ser365_Asn367del) (homozygous)                                | Booth et al, (2020)                | 1           | NA         | Birth                   | NA           | NA                          | NA                     | NA                              | DFNB110 phenotype                                                                |

Legend: Study characteristics and overview of the audiovestibular phenotype of COCH variants not associated with DFNA9. COCH transcript NM\_004086.2 was used as reference sequence. NR: not reported, HL: hearing loss, V: vestibular dysfunction, Vb: bilateral vestibular dysfunction, Vn: no vestibular dysfunction

**Supplementary Table S5:** Suspected mechanisms of action of different pathogenic COCH variants (based on literature) correlated to calculated age of onset and progression of HL.

| Variant in Cochlin | Protein Domain | ER to Golgi transport | Cleavage | Secretion | Dimerisation /aggregation | Number of subjects in analysis (number of audiograms in analysis) | Calculated age of onset (years) | Progression (dB/year) |
|--------------------|----------------|-----------------------|----------|-----------|---------------------------|-------------------------------------------------------------------|---------------------------------|-----------------------|
| p.Pro51Ser         | LCCL           | normal                | ↓        | normal    | dimerization              | 130(397)                                                          | 37,44                           | 2,17                  |
| p.Val66Gly         | LCCL           | normal                | ↓        | normal    | dimerization              | 7(9)                                                              | 17,63                           | 3,95                  |
| p.Gly87Trp         | LCCL           | normal                | N/A      | normal    | none                      | 28(67)                                                            | 36,43                           | 1,71                  |
| p.Gly87Val         | LCCL           | normal                | N/A      | N/A       | N/A                       | 5(11)                                                             | 38,75                           | 3,39                  |
| p.Gly88Glu         | LCCL           | normal                | ↓ ↓      | normal    | dimerization              | 26(61)                                                            | 47,88                           | 3,39                  |
| p.Val92Asp         | LCCL           | normal                | N/A      | N/A       | N/A                       | 6(6)                                                              | 37,92                           | 2,32                  |
| p.Ile109Thr        | LCCL           | normal                | ↓ ↓ ↓    | ↓ ↓ ↓     | dimerization              | 11(34)                                                            | 35,06                           | 2,48                  |
| p.Ile109Asn        | LCCL           | normal                | N/A      | N/A       | N/A                       | 8(52)                                                             | 21,24                           | 1,78                  |
| p.Trp117Arg        | LCCL           | normal                | ↓ ↓ ↓    | normal    | none                      | 10(10)                                                            | 26,79                           | 2,57                  |
| p.Phe121Ser        | LCCL           | normal                | N/A      | N/A       | N/A                       | 10(18)                                                            | 43,5                            | 4,35                  |
| p.Cys162Tyr        | Ivd1           | ER-retention          | ↓ ↓ ↓    | ↓ ↓       | oligomerization           | 3(7)                                                              | 2,7                             | 0,96                  |
| p.Ile372Thr        | vWFA2          | N/A                   | N/A      | N/A       | N/A                       | 4(6)                                                              | 7,7                             | 1,16                  |
| p. Arg438Cys       | vWFA2          | N/A                   | N/A      | N/A       | N/A                       | 14(29)                                                            | 41,64                           | 1,28                  |
| p.Ala487Pro        | vWFA2          | ER-retention          | N/A      | ↓ ↓       | oligomerization           | 9(9)                                                              | 26,85                           | 1,77                  |
| p.Cys542Phe        | vWFA2          | normal                | N/A      | normal    | N/A                       | 14(17)                                                            | -8,73                           | 1,04                  |

Legend: Table showing the effects of various DFNA9-associated COCH variants on intracellular protein transport, post-translational processing, secretion and dimer/oligomer formation of mutant cochlin proteins in relation to the calculated age of onset and annual progression. Different colors show the relative severity of the annual progression (last column) the calculated age of onset (second to last column), where green indicates slow progression of late onset, and red fast progression or early onset. NP\_004077.1 was used as reference. N/A: not available. Arrows indicate amount of reduction in cochlin cleavage and secretion: ↓ = mild, ↓ ↓ = moderate, ↓ ↓ ↓ = severe.

## Supplementary Figures

**Supplementary Figure S1:** COCH domains (SP, LCCL, ivd1, vWFA1, ivd2 and vWFA2) and reported pathogenic variants causative for DFNA9.

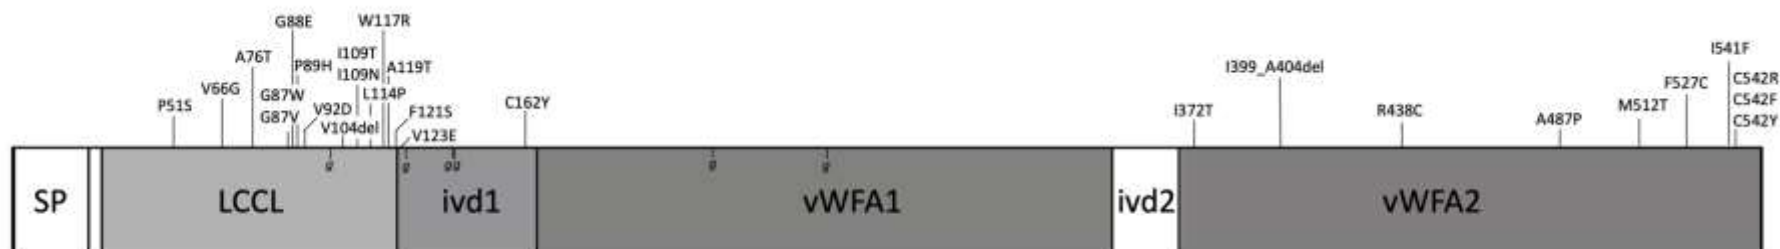

Legend: known and predicted glycosylation sites curated in the NextProt database are depicted as "g". Note that none of these sites are mutated in DFNA9." [https://www.nextprot.org/entry/NX\\_O43405/sequence](https://www.nextprot.org/entry/NX_O43405/sequence) (accessed: 18 January 2022)

**Supplementary Figure S2:** Vestibular function, based on objective vestibular examinations, over decades in percentage of subjects from the LCCL group

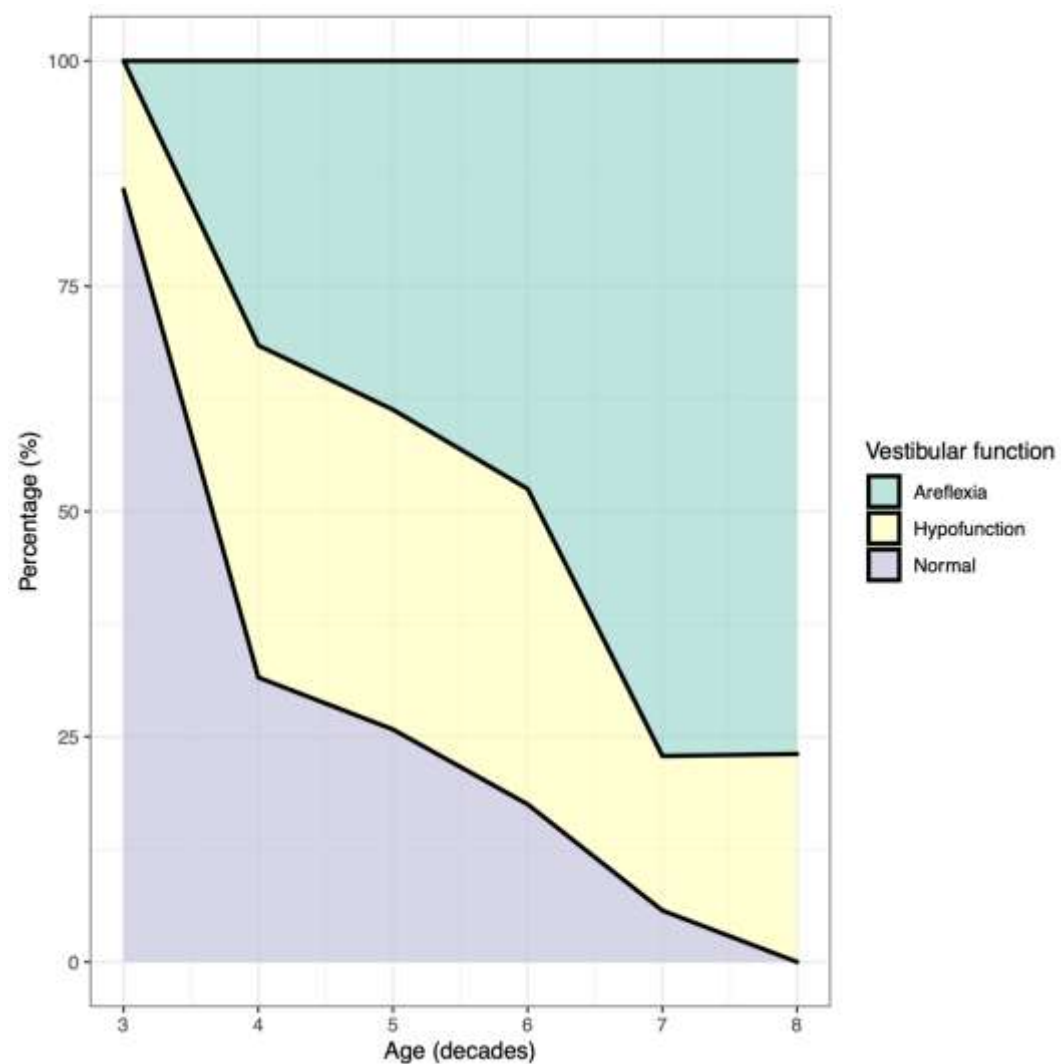

Legend: Figure showing the distribution of vestibular function at a specific age (Areflexia, Hypofunction, Normal) in percentages over time of patients with pathogenic variants affecting the LCCL domain.

**Supplementary Figure S3:** Individual audiograms at various ages of affected subjects of seven COCH variants

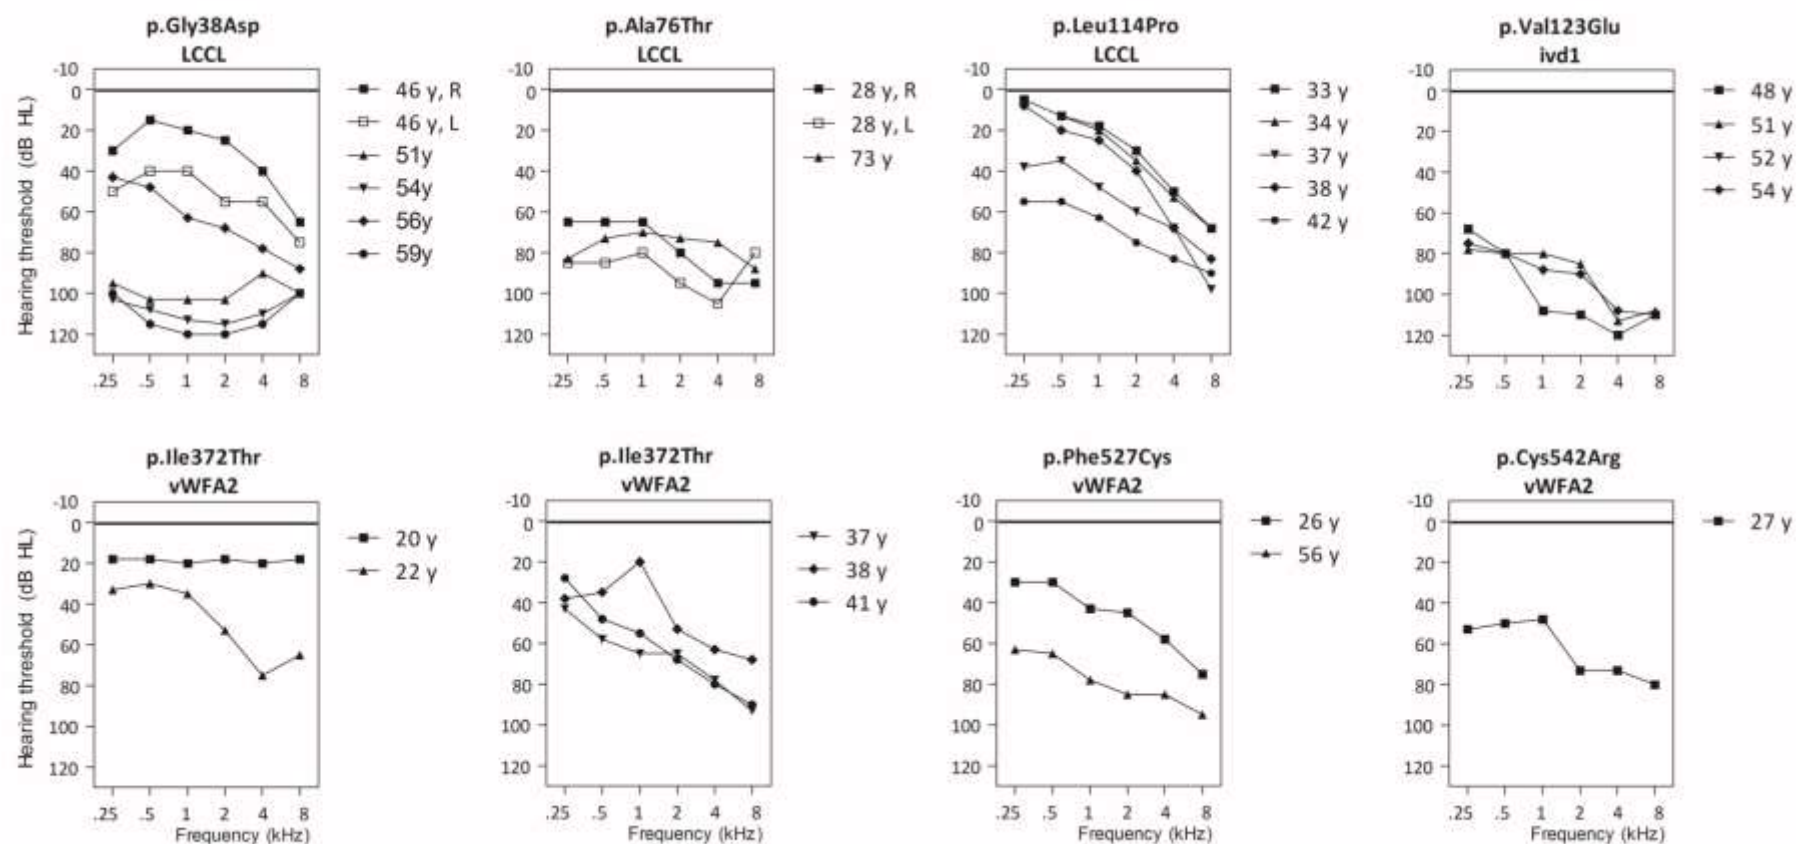

Legend: Air conduction threshold levels are depicted. In the case of asymmetry open symbols were used for the left ear. The audiometric data for p.Ile372Thr has been split in two panels for clarity purposes. R: right ear, L: left ear, dB HL: decibel hearing level, kHz: kilohertz, y: age in years



**Supplementary Figure S4:** The distribution of the number of subjects per variant categorized by affected cochlin domain (LCCL, Ivd1 and vWFA2).

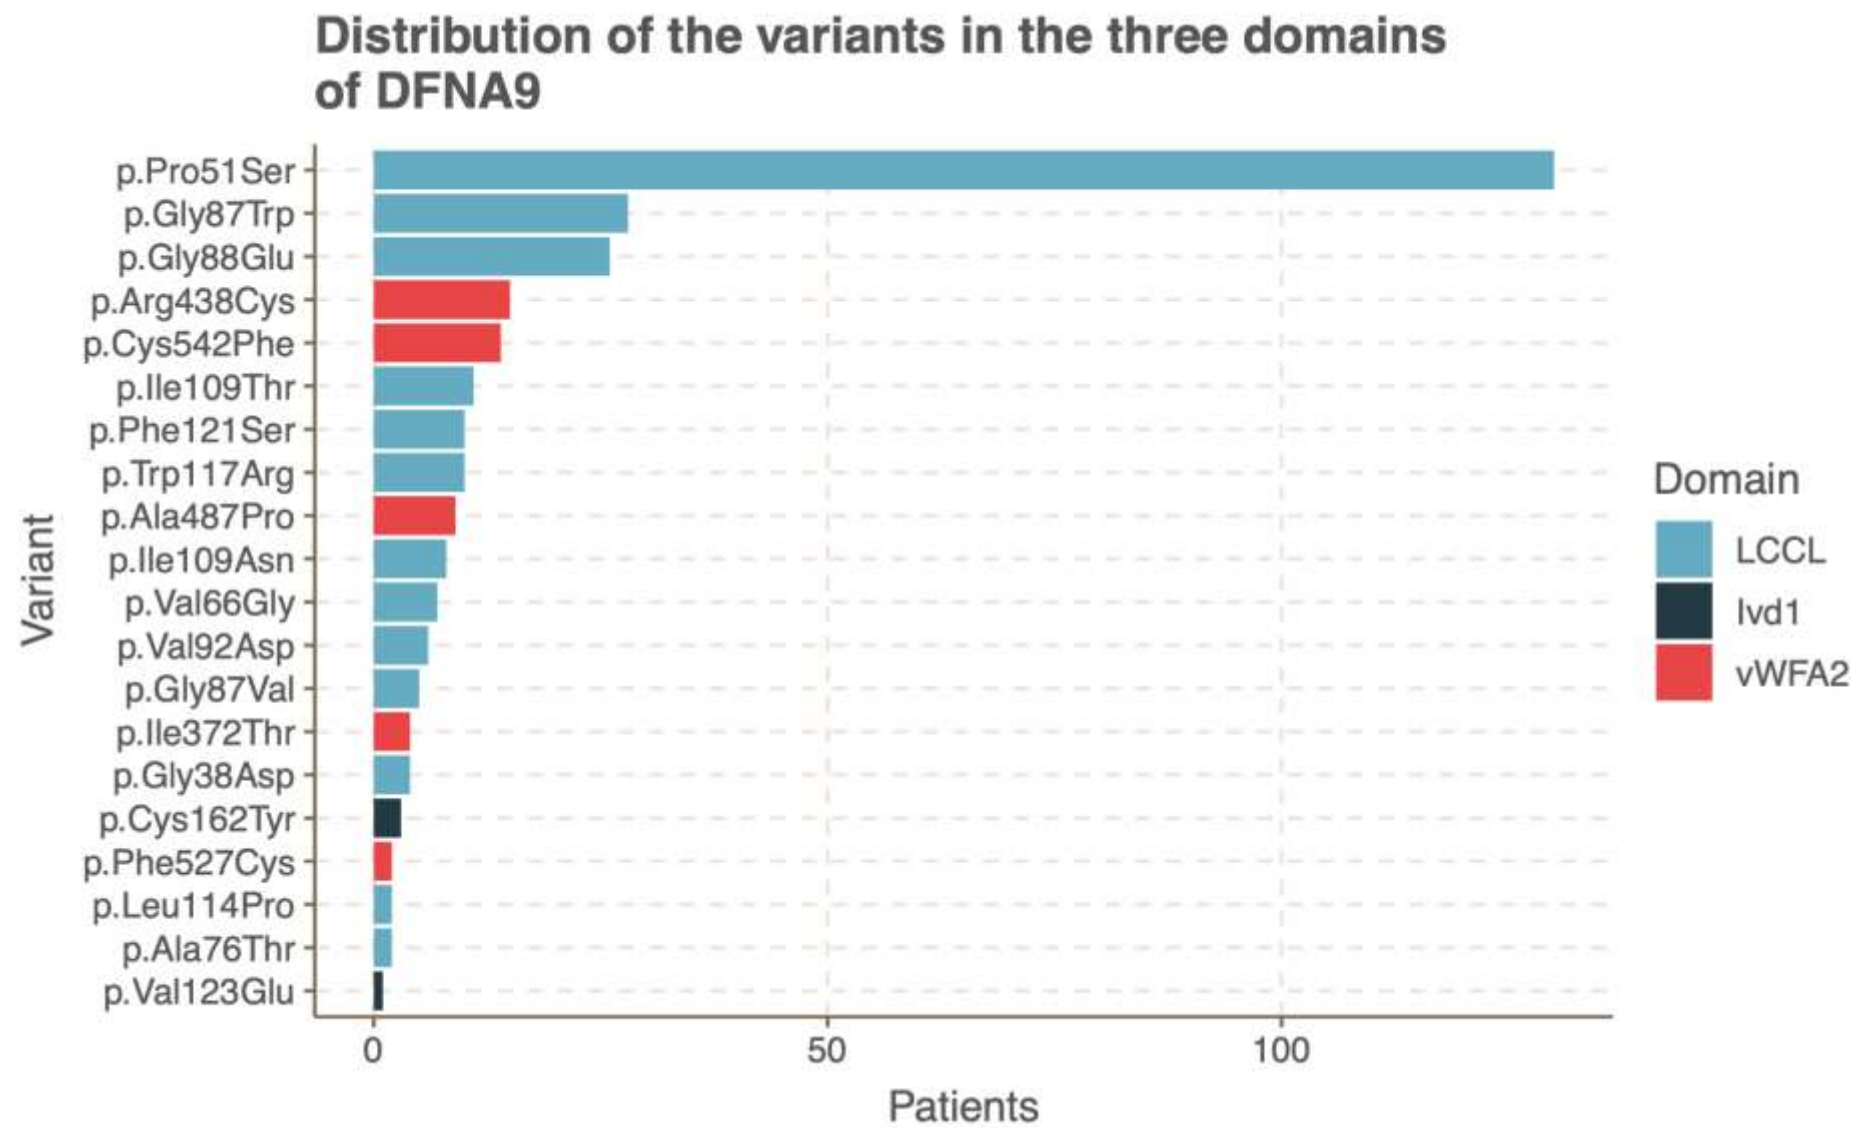

Legend: Figure showing the number of patients per variant and domain used in the meta-analysis.

**Supplementary Figure S5:** Progression of hearing loss in subjects grouped by affected domain of cochlin and specific pathogenic variant.

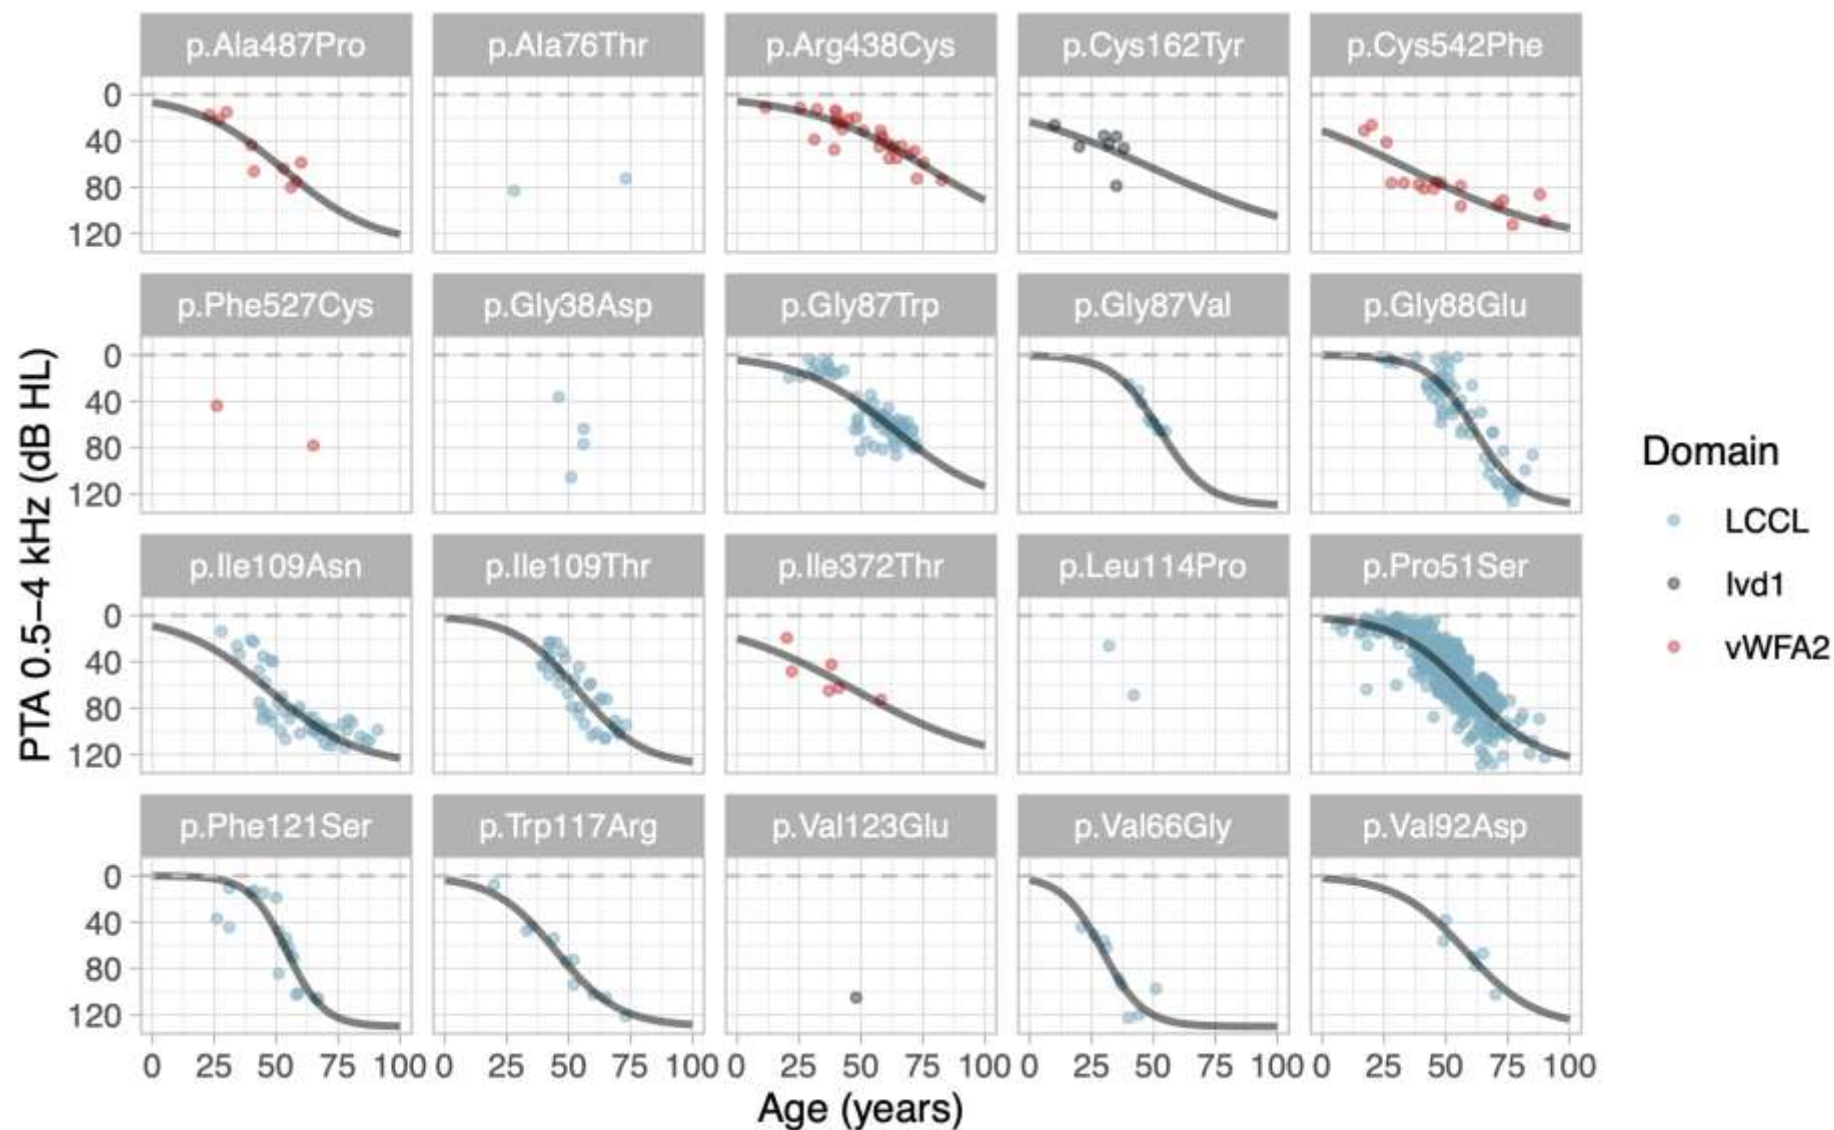

Legend: Figure showing the individual ATD of the pure-tone average across PTA<sub>0.5-4kHz</sub> with increasing age.
